# Supplementary material
Source: Springer Nature journal article supplement (https://www.springermedizin.de/resource/supplementary/12886_2009_154_MOESM4_ESM.pdf/9474814)

*In-vivo*

Histology

Superficial

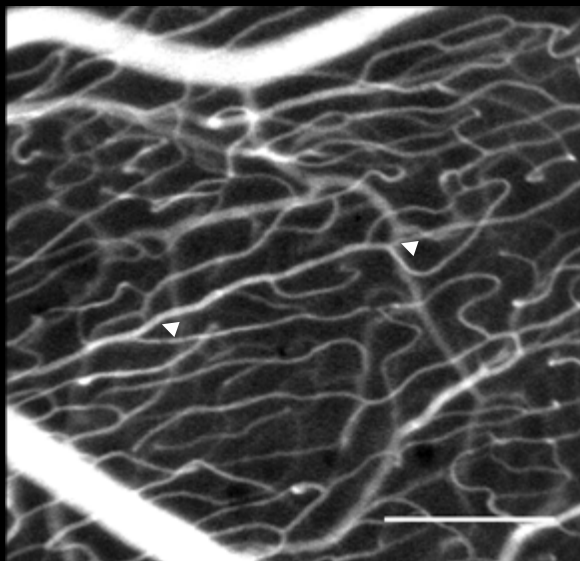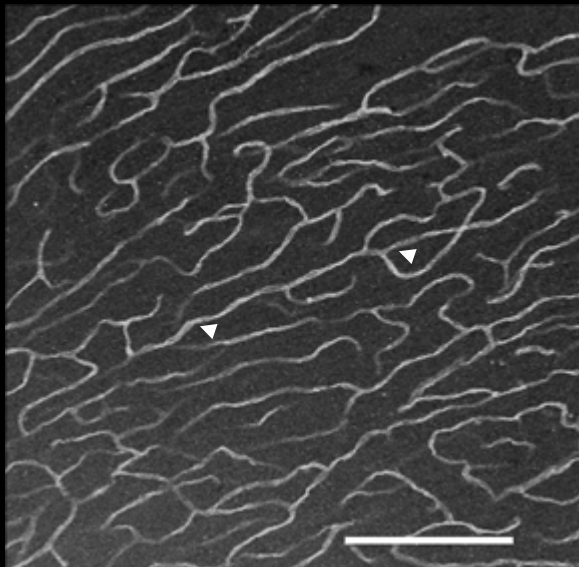

Deep

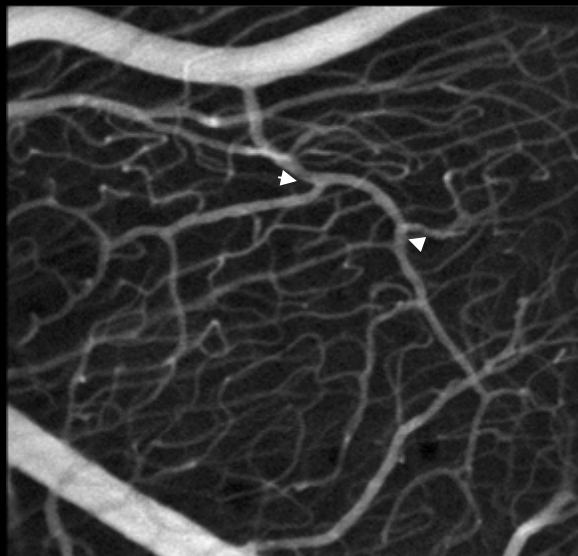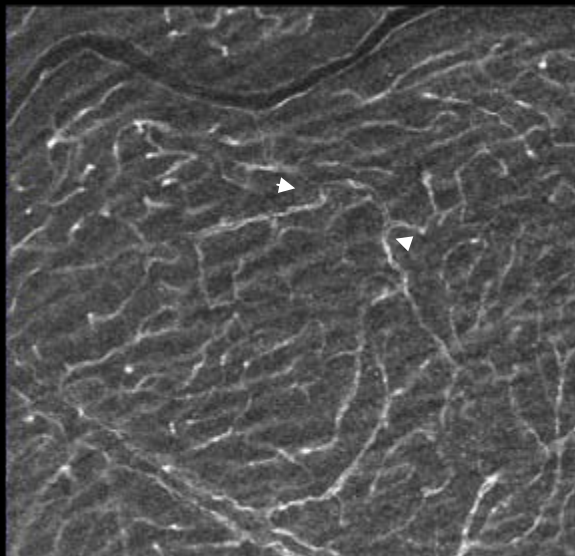

Supplement: MOESM4 [file 9474814]
